# Supplementary material for: Physics-informed machine learning for understanding rock moisture dynamics in a sandstone cave
Source: Copernicus journal article supplement (doi:10.5194/hess-27-2579-2023), 2023-07-17
Supplement: Supplementary file 1 [file hess-27-2579-2023-supplement.pdf]

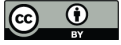

*Supplement of*

## **Physics-informed machine learning for understanding rock moisture dynamics in a sandstone cave**

**Kai-Gao Ouyang et al.**

*Correspondence to:* Xiao-Wei Jiang ([jxw@cugb.edu.cn](mailto:jxw@cugb.edu.cn))

The copyright of individual parts of the supplement might differ from the article licence.

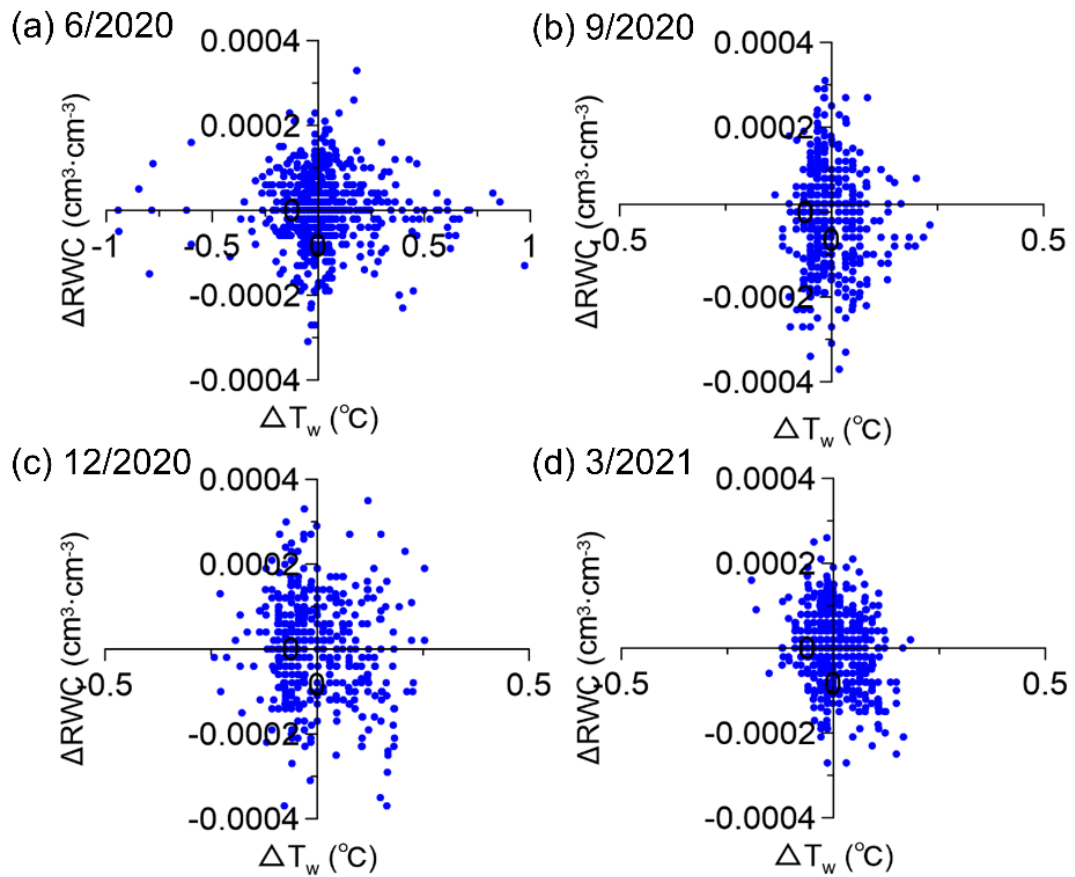

Figure S1. Plots of  $\Delta RWC$  versus  $\Delta T_w$  showing no temperature effect for the FDR sensor installed inside Cave #9.  $\Delta RWC$  represents the hourly change in rock water content, which is calculated by  $RWC_t - RWC_{t-1}$ , and  $\Delta T_w$  represents the hourly change in temperature, which is calculated by  $T_t - T_{t-1}$ . (a) June 2020; (b) September 2020; (c) December 2020; (d) March 2021.
